# Supplementary material for: The Pertinent Literature of Enhanced Recovery after Surgery Programs: A Bibliometric Approach
Source: PubMed Central journal article supplement (PMC7922786; doi:10.3390/medicina57020172), 2021-02-17
Supplement: medicina-57-00172-s001.pdf [file medicina-57-00172-s001.pdf]

---

| <b>Cluster 1</b>   |                                        |
|--------------------|----------------------------------------|
| <b>Occurrences</b> | <b>Words</b>                           |
| 250                | rehabilitation                         |
| 120                | total knee arthroplasty                |
| 66                 | hip fracture                           |
| 63                 | elderly                                |
| 61                 | total hip arthroplasty                 |
| 51                 | enhanced recovery after surgery (eras) |
| 51                 | quality of life                        |
| 49                 | patient                                |
| 43                 | randomized controlled trial            |
| 43                 | anterior cruciate ligament             |
| 42                 | exercise                               |

---



---

| <b>Cluster 2</b>   |                                 |
|--------------------|---------------------------------|
| <b>Occurrences</b> | <b>Words</b>                    |
| 379                | enhanced recovery after surgery |
| 297                | colorectal surgery              |
| 261                | complications                   |
| 200                | length of stay                  |
| 199                | laparoscopy                     |
| 156                | perioperative care              |
| 154                | outcomes                        |
| 135                | fast-track surgery              |
| 122                | postoperative complications     |
| 107                | colorectal cancer               |
| 106                | meta-analysis                   |
| 90                 | colorectal                      |
| 75                 | NSQIP                           |
| 75                 | morbidity                       |
| 74                 | bariatric surgery               |
| 67                 | mortality                       |
| 64                 | gastric cancer                  |
| 64                 | postoperative ileus             |
| 56                 | gastrectomy                     |
| 53                 | fast track surgery              |
| 52                 | readmission                     |
| 51                 | quality improvement             |
| 45                 | postoperative recovery          |
| 45                 | rectal cancer                   |
| 44                 | colectomy                       |
| 42                 | pancreaticoduodenectomy         |

---

---

| <b>Cluster 3</b>   |                 |
|--------------------|-----------------|
| <b>Occurrences</b> | <b>Words</b>    |
| 476                | surgery         |
| 97                 | outcome         |
| 78                 | nutrition       |
| 65                 | cancer          |
| 64                 | perioperative   |
| 56                 | prehabilitation |
| 46                 | nursing         |
| 43                 | oral nutrition  |

---



---

| <b>Cluster 4</b>   |                                   |
|--------------------|-----------------------------------|
| <b>Occurrences</b> | <b>Words</b>                      |
| 261                | pain                              |
| 246                | postoperative                     |
| 229                | analgesia                         |
| 220                | postoperative pain                |
| 146                | anesthesia                        |
| 77                 | propofol                          |
| 76                 | pain management                   |
| 71                 | epidural analgesia                |
| 70                 | remifentanil                      |
| 68                 | opioids                           |
| 65                 | postoperative analgesia           |
| 63                 | postoperative nausea and vomiting |
| 58                 | dexmedetomidine                   |
| 58                 | dexamethasone                     |
| 57                 | ropivacaine                       |
| 54                 | vomiting                          |
| 53                 | bupivacaine                       |
| 53                 | sevoflurane                       |
| 52                 | morphine                          |
| 50                 | ketamine                          |
| 46                 | multimodal analgesia              |
| 44                 | fentanyl                          |
| 43                 | nausea                            |

---

---

| <b>Cluster 5</b>   |                    |
|--------------------|--------------------|
| <b>Occurrences</b> | <b>Words</b>       |
| 161                | fast-track         |
| 112                | cardiac surgery    |
| 109                | recovery           |
| 79                 | postoperative care |

---
